# Supplementary material for: Computerized Adaptive Testing for Sleep Disorders
Source: Atypon-hosted journal article supplement (doi:10.1027/2512-8442/a000076), 2021-03-17
Supplement: 2512-8442_a000076_esm1.pdf [file 2512-8442_a000076_esm1.pdf]

**TABLE E1** | Fundamental information of final item bank for CAT-SD ( $N=94$ ).

| <i>Item</i> | <i>Abbreviated item content</i>        | <i>Item parameters</i> |              |           |           |           |           |           | <i>Item-fit estimates</i> |           |                | <i>DIF</i>                  |
|-------------|----------------------------------------|------------------------|--------------|-----------|-----------|-----------|-----------|-----------|---------------------------|-----------|----------------|-----------------------------|
|             |                                        | <i>a</i>               | <i>Grade</i> | <i>b1</i> | <i>b2</i> | <i>b3</i> | <i>b4</i> | <i>b5</i> | <i>S-X2</i>               | <i>df</i> | <i>p value</i> | <i>R<sup>2</sup> change</i> |
| N2          | Wake up early                          | 0.95                   | 4            | -0.05     | 1.43      | 3.24      | -         | -         | 251.57                    | 252       | 0.496          | 0.0005                      |
| N3          | Go to the bathroom                     | 0.63                   | 4            | 0.23      | 2.55      | 4.28      | -         | -         | 246.77                    | 259       | 0.697          | 0.0004                      |
| N4          | Not breathing properly                 | 1.44                   | 4            | 0.90      | 1.94      | 3.36      | -         | -         | 172.71                    | 161       | 0.250          | 0.0082                      |
| N5          | Coughing or snoring loudly             | 0.76                   | 4            | 0.99      | 2.53      | 4.65      | -         | -         | 261.75                    | 228       | 0.062          | 0.0078                      |
| N6          | Feel cold                              | 0.71                   | 4            | -0.20     | 1.44      | 3.43      | -         | -         | 174.06                    | 184       | 0.689          | 0.0022                      |
| N7          | Feel hot                               | 0.87                   | 4            | 0.36      | 1.94      | 4.28      | -         | -         | 250.53                    | 246       | 0.408          | 0.0018                      |
| N8          | Having nightmares                      | 0.90                   | 4            | -0.06     | 1.86      | 4.17      | -         | -         | 274.59                    | 243       | 0.080          | 0.0014                      |
| N9          | Pain and discomfort                    | 1.38                   | 4            | 0.85      | 2.00      | 3.36      | -         | -         | 158.52                    | 161       | 0.541          | 0.0099                      |
| N11         | Other things that interfere with sleep | 1.12                   | 4            | -0.67     | 0.82      | 2.49      | -         | -         | 258.98                    | 253       | 0.385          | 0.0069                      |
| N12         | Sleep quality                          | 1.31                   | 4            | -1.44     | 1.11      | 3.04      | -         | -         | 174.36                    | 199       | 0.896          | 0.0106                      |
| N15         | Have insufficient energy to do things  | 1.15                   | 4            | -1.44     | 1.15      | 2.55      | -         | -         | 224.94                    | 231       | 0.600          | 0.0126                      |
| N24         | Dozing off while sitting reading       | 0.84                   | 4            | -1.68     | 0.94      | 3.17      | -         | -         | 269.36                    | 243       | 0.118          | 0.0002                      |
| N25         | Nodding off while watching TV          | 1.01                   | 4            | -0.49     | 1.51      | 2.92      | -         | -         | 249.54                    | 237       | 0.275          | 0.0083                      |

|     |                                                          |      |   |       |      |      |   |   |        |     |       |        |
|-----|----------------------------------------------------------|------|---|-------|------|------|---|---|--------|-----|-------|--------|
| N26 | Dozing off while sitting in a dull public place          | 0.84 | 4 | -1.14 | 0.78 | 2.47 | - | - | 264.14 | 241 | 0.146 | 0.0005 |
| N30 | Sitting quietly dozing off after a boozy lunch           | 0.70 | 4 | -1.04 | 0.77 | 2.69 | - | - | 352.94 | 326 | 0.146 | 0.0027 |
| N31 | Dozing off in traffic jams for a few minutes             | 1.11 | 4 | 0.71  | 2.12 | 3.41 | - | - | 209.04 | 190 | 0.164 | 0.0192 |
| N32 | Sleep is difficult                                       | 1.55 | 4 | -0.67 | 1.50 | 2.82 | - | - | 184.76 | 182 | 0.429 | 0.0026 |
| N33 | Always forget things                                     | 0.96 | 4 | -1.81 | 1.41 | 3.50 | - | - | 205.74 | 218 | 0.715 | 0.0113 |
| N34 | Sleep well at night, but I sleep a lot during the day    | 0.72 | 4 | -1.99 | 1.72 | 4.79 | - | - | 234.27 | 241 | 0.610 | 0.0048 |
| N35 | Surroundings are quiet or monotonous, I will feel sleepy | 1.02 | 4 | -1.43 | 1.79 | 3.82 | - | - | 241.23 | 210 | 0.069 | 0.0010 |
| N38 | Getting confused about some simple things                | 1.28 | 4 | -0.74 | 1.57 | 3.29 | - | - | 214.13 | 203 | 0.283 | 0.0004 |
| N39 | Often wake up and hard to fall asleep again              | 1.66 | 4 | 0.21  | 1.96 | 3.20 | - | - | 149.71 | 149 | 0.468 | 0.0005 |
| N40 | Go to bed early and wake up late                         | 0.80 | 4 | -0.48 | 2.46 | 4.64 | - | - | 256.87 | 225 | 0.071 | 0.0063 |
| N41 | Have an uncontrollable urge to sleep                     | 1.36 | 4 | 0.00  | 2.11 | 3.46 | - | - | 175.37 | 161 | 0.207 | 0.0054 |
| N42 | Ineffective work                                         | 1.40 | 4 | -0.94 | 1.60 | 2.97 | - | - | 168.47 | 182 | 0.756 | 0.0017 |
| N43 | Awakened by nightmares.                                  | 1.28 | 4 | 0.01  | 2.30 | 4.21 | - | - | 152.86 | 155 | 0.534 | 0.0096 |
| N44 | Too little sleep                                         | 1.18 | 4 | -0.92 | 1.42 | 3.12 | - | - | 211.42 | 222 | 0.684 | 0.0029 |
| N45 | Always dreaming                                          | 0.79 | 4 | -1.94 | 1.34 | 3.34 | - | - | 256.11 | 242 | 0.255 | 0.0045 |

|     |                                                                                      |      |   |       |      |      |      |   |        |     |       |        |
|-----|--------------------------------------------------------------------------------------|------|---|-------|------|------|------|---|--------|-----|-------|--------|
| N46 | Hard to concentrate                                                                  | 1.32 | 4 | -1.23 | 1.52 | 3.20 | -    | - | 197.75 | 188 | 0.299 | 0.0022 |
| N47 | Retardation                                                                          | 1.46 | 4 | -0.92 | 1.54 | 3.04 | -    | - | 203.11 | 180 | 0.114 | 0.0032 |
| N48 | Talk /Moan in sleep                                                                  | 0.99 | 4 | 0.60  | 2.65 | 4.80 | -    | - | 192.75 | 168 | 0.093 | 0.0129 |
| N49 | Numbness of limbs and trunk/<br>awakening, inability to open eyes,<br>speak and move | 1.43 | 4 | 0.19  | 2.08 | 3.47 | -    | - | 184.65 | 153 | 0.041 | 0.0015 |
| N51 | Sleepy during the day                                                                | 1.38 | 4 | -1.20 | 1.23 | 2.63 | -    | - | 194.60 | 202 | 0.633 | 0.0078 |
| N52 | Not happy with my sleep                                                              | 1.38 | 4 | -1.36 | 0.97 | 2.40 | -    | - | 203.79 | 204 | 0.491 | 0.0096 |
| N55 | Sleep very shallow                                                                   | 1.37 | 4 | -0.31 | 1.35 | 2.74 | -    | - | 226.89 | 221 | 0.378 | 0.0005 |
| N56 | Loss of interest                                                                     | 1.63 | 4 | -0.36 | 1.48 | 2.74 | -    | - | 171.69 | 178 | 0.619 | 0.0014 |
| N58 | Do you feel fully rested after sleep                                                 | 0.87 | 5 | -1.95 | 0.45 | 2.46 | 3.20 | - | 336.98 | 307 | 0.115 | 0.0034 |
| N59 | Have you slept at night and dozed<br>off during the day                              | 1.07 | 5 | -0.69 | 1.03 | 2.45 | 3.95 | - | 279.04 | 281 | 0.522 | 0.0027 |
| N60 | Average about a few hours of sleep a<br>night                                        | 0.65 | 5 | -4.66 | 0.46 | 4.36 | 4.44 | - | 153.85 | 153 | 0.465 | 0.0018 |
| N61 | Do you have difficulty falling asleep                                                | 1.62 | 5 | -0.03 | 1.28 | 2.20 | 3.40 | - | 216.57 | 211 | 0.382 | 0.0004 |
| N62 | Do you wake up easily after falling<br>asleep                                        | 1.47 | 5 | 0.27  | 1.60 | 2.64 | 3.66 | - | 188.68 | 191 | 0.533 | 0.0070 |
| N63 | Do you have trouble falling asleep<br>after you wake up                              | 1.53 | 5 | 0.35  | 1.53 | 2.40 | 3.33 | - | 199.57 | 195 | 0.396 | 0.0020 |
| N64 | Have you had many dreams or been<br>awakened by nightmares                           | 1.31 | 5 | 0.49  | 1.77 | 2.78 | 3.72 | - | 223.60 | 194 | 0.071 | 0.0064 |

|     |                                                                  |      |   |       |       |      |      |   |        |     |       |        |
|-----|------------------------------------------------------------------|------|---|-------|-------|------|------|---|--------|-----|-------|--------|
| N66 | What is your mood after losing sleep                             | 0.83 | 5 | -1.82 | -0.45 | 2.33 | 2.71 | - | 355.53 | 334 | 0.200 | 0.0120 |
| N71 | Wake up with a dry mouth                                         | 0.95 | 4 | -1.71 | 1.26  | 3.51 | -    | - | 192.37 | 225 | 0.944 | 0.0022 |
| N72 | Wake up during the night while coughing or being short of breath | 1.58 | 4 | 0.81  | 2.33  | 3.73 | -    | - | 149.89 | 121 | 0.038 | 0.0097 |
| N73 | Wake up with a sour taste in my mouth                            | 1.24 | 4 | 0.27  | 2.01  | 3.69 | -    | - | 181.52 | 181 | 0.475 | 0.0129 |
| N74 | Wake up with a headache                                          | 1.48 | 4 | -0.04 | 2.02  | 3.40 | -    | - | 186.66 | 157 | 0.053 | 0.0006 |
| N75 | Have difficulty in falling asleep                                | 2.09 | 4 | -0.02 | 1.32  | 2.39 | -    | - | 160.82 | 170 | 0.681 | 0.0017 |
| N76 | Thoughts go through my head and keep me awake                    | 1.62 | 4 | -0.83 | 1.10  | 2.54 | -    | - | 194.80 | 204 | 0.666 | 0.0069 |
| N77 | Worry and find it hard to relax                                  | 1.65 | 4 | -0.37 | 1.49  | 2.96 | -    | - | 175.23 | 179 | 0.566 | 0.0097 |
| N78 | Wake up during the night                                         | 1.48 | 4 | 0.06  | 2.04  | 3.78 | -    | - | 184.60 | 155 | 0.052 | 0.0036 |
| N79 | After waking up during the night, I fall asleep slowly           | 1.76 | 4 | 0.27  | 1.65  | 2.98 | -    | - | 203.15 | 162 | 0.016 | 0.0013 |
| N80 | Wake up early and cannot get back to sleep                       | 1.50 | 4 | 0.32  | 1.80  | 3.31 | -    | - | 169.21 | 173 | 0.567 | 0.0042 |
| N81 | Sleep lightly                                                    | 1.31 | 4 | -0.20 | 1.41  | 2.66 | -    | - | 250.22 | 228 | 0.149 | 0.0005 |
| N82 | Sleep too little                                                 | 1.44 | 4 | -0.74 | 1.13  | 2.50 | -    | - | 209.32 | 217 | 0.633 | 0.0072 |

---

|      |                                                               |      |   |       |      |      |   |   |        |     |       |        |
|------|---------------------------------------------------------------|------|---|-------|------|------|---|---|--------|-----|-------|--------|
| N83  | See dreamlike images when falling asleep or waking up         | 1.27 | 4 | 0.29  | 1.91 | 3.65 | - | - | 206.24 | 186 | 0.147 | 0.0029 |
| N85  | Have sleep attacks during the day                             | 1.53 | 4 | -0.93 | 1.50 | 3.11 | - | - | 201.24 | 176 | 0.093 | 0.0087 |
| N86  | Have sleep attacks during the day                             | 1.87 | 4 | 0.16  | 1.55 | 2.89 | - | - | 209.35 | 167 | 0.014 | 0.0018 |
| N87  | Sometimes cannot move when falling asleep or waking up        | 1.64 | 4 | 0.39  | 2.14 | 3.33 | - | - | 147.67 | 128 | 0.112 | 0.0056 |
| N88  | Kick my legs                                                  | 1.04 | 4 | -0.18 | 2.39 | 4.62 | - | - | 200.49 | 182 | 0.165 | 0.0039 |
| N89  | Have cramps or pain in my legs                                | 0.98 | 4 | -0.05 | 2.85 | 5.23 | - | - | 202.30 | 159 | 0.011 | 0.0058 |
| N90  | Feel little shocks in my legs                                 | 1.58 | 4 | 0.86  | 2.24 | 3.89 | - | - | 145.89 | 119 | 0.047 | 0.0149 |
| N91  | Cannot keep my legs                                           | 1.80 | 4 | 0.80  | 2.26 | 3.28 | - | - | 151.33 | 119 | 0.024 | 0.0067 |
| N92  | Would rather go to bed at a different time                    | 1.15 | 4 | -0.15 | 1.92 | 3.57 | - | - | 190.35 | 204 | 0.745 | 0.0026 |
| N94  | Go to bed at very different times                             | 1.33 | 4 | -0.06 | 1.61 | 2.83 | - | - | 184.02 | 207 | 0.873 | 0.0019 |
| N98  | Having performed an action during the night I do not remember | 0.90 | 4 | -0.55 | 1.79 | 3.81 | - | - | 191.20 | 244 | 0.995 | 0.0013 |
| N99  | Have frightening dreams                                       | 1.31 | 4 | -0.13 | 2.11 | 3.86 | - | - | 184.44 | 163 | 0.120 | 0.0059 |
| N100 | Wake up from dreams                                           | 0.62 | 4 | -1.17 | 2.88 | 4.04 | - | - | 225.34 | 242 | 0.772 | 0.0023 |
| N103 | Have physical symptoms during or after dreams                 | 0.58 | 4 | -1.08 | 2.95 | 4.88 | - | - | 253.33 | 249 | 0.412 | 0.0041 |

---

|      |                                                                       |      |   |       |      |      |      |   |        |     |       |        |
|------|-----------------------------------------------------------------------|------|---|-------|------|------|------|---|--------|-----|-------|--------|
| N104 | My bedroom is too light                                               | 1.07 | 4 | 0.31  | 2.08 | 3.68 | -    | - | 223.16 | 205 | 0.183 | 0.0031 |
| N105 | My bedroom is too noisy                                               | 1.07 | 4 | 0.06  | 1.97 | 3.59 | -    | - | 209.39 | 212 | 0.538 | 0.0004 |
| N109 | Feel sad                                                              | 1.69 | 4 | -0.02 | 1.73 | 2.93 | -    | - | 161.36 | 163 | 0.522 | 0.0000 |
| N110 | Have no pleasure or interest                                          | 1.60 | 4 | -0.34 | 1.71 | 3.03 | -    | - | 188.90 | 172 | 0.179 | 0.0020 |
| N111 | Feel tired at getting up                                              | 1.78 | 4 | -0.20 | 1.47 | 2.75 | -    | - | 168.24 | 176 | 0.650 | 0.0014 |
| N112 | Feel sleepy during the day and<br>Struggle to remain alert            | 1.62 | 4 | -0.20 | 1.62 | 2.82 | -    | - | 181.84 | 181 | 0.468 | 0.0019 |
| N114 | Easily irritated                                                      | 1.36 | 4 | -0.12 | 1.81 | 3.30 | -    | - | 183.11 | 191 | 0.646 | 0.0002 |
| N115 | Have difficulty in concentrating at<br>work or school                 | 1.27 | 4 | -0.85 | 1.34 | 2.93 | -    | - | 221.48 | 219 | 0.440 | 0.0078 |
| N116 | Worry whether I sleep enough                                          | 1.52 | 4 | -0.56 | 1.05 | 2.38 | -    | - | 213.78 | 221 | 0.624 | 0.0067 |
| N117 | Generally, I sleep badly                                              | 2.02 | 4 | -0.51 | 1.01 | 2.28 | -    | - | 204.14 | 186 | 0.172 | 0.0064 |
| N119 | Hard to discontinue your thoughts<br>before going to bed              | 1.47 | 5 | -0.74 | 0.47 | 1.66 | 2.78 | - | 311.01 | 292 | 0.213 | 0.0033 |
| N120 | Feel drowsy during the day                                            | 1.38 | 5 | -1.13 | 0.47 | 1.92 | 3.08 | - | 262.54 | 252 | 0.311 | 0.0044 |
| N122 | Have trouble in sleeping                                              | 1.96 | 5 | -0.18 | 0.86 | 1.62 | 2.55 | - | 241.47 | 245 | 0.552 | 0.0034 |
| N123 | Woke up in pain                                                       | 1.52 | 5 | 0.65  | 1.69 | 2.76 | 3.78 | - | 198.80 | 169 | 0.058 | 0.0122 |
| N124 | I was tired, so I had to avoid or<br>cancel activities with my friend | 1.87 | 5 | 0.24  | 1.17 | 2.12 | 2.95 | - | 167.11 | 192 | 0.902 | 0.0024 |
| N126 | Difficulty falling asleep                                             | 2.27 | 5 | -0.03 | 1.04 | 1.95 | 2.74 | - | 178.63 | 186 | 0.638 | 0.0018 |

---

|      |                                                                  |      |   |       |       |      |      |      |        |     |       |        |
|------|------------------------------------------------------------------|------|---|-------|-------|------|------|------|--------|-----|-------|--------|
| N127 | Difficulty maintaining sleep                                     | 2.49 | 5 | 0.21  | 1.20  | 2.05 | 2.64 | -    | 143.90 | 154 | 0.709 | 0.0061 |
| N128 | Go to bed early                                                  | 0.88 | 5 | -0.36 | 1.62  | 3.55 | 5.39 | -    | 265.49 | 246 | 0.188 | 0.0080 |
| N130 | Sleep problems interfere with your daytime functions             | 1.41 | 5 | -1.41 | 0.62  | 1.99 | 3.30 | -    | 251.87 | 236 | 0.228 | 0.0130 |
| N131 | Insomnia affect your quality of life                             | 1.74 | 5 | -0.71 | 0.72  | 2.01 | 3.05 | -    | 230.01 | 217 | 0.260 | 0.0011 |
| N132 | How much anxiety you have about your current sleep problems      | 2.28 | 5 | -0.43 | 0.76  | 1.77 | 2.61 | -    | 188.97 | 199 | 0.684 | 0.0007 |
| N133 | How long did it usually take you to fall asleep in the past week | 1.33 | 5 | -0.07 | 1.47  | 2.52 | 3.42 | -    | 236.77 | 221 | 0.222 | 0.0010 |
| N135 | Wake up in the morning feeling rested and energized              | 0.93 | 6 | -2.52 | -0.75 | 0.14 | 1.50 | 3.80 | 411.63 | 423 | 0.645 | 0.0095 |
| N143 | Feeling rested                                                   | 0.80 | 6 | -3.13 | -1.02 | 0.03 | 1.43 | 3.67 | 481.26 | 426 | 0.033 | 0.0103 |

---
